# Supplementary material for: Photosensitizing Furocoumarins: Content in Plant Matrices and Kinetics of Supercritical Carbon Dioxide Extraction
Source: MDPI journal article supplement (doi:10.3390/molecules25173805), 2020-08-21
Supplement: s1 [file s1]

**Table S1.** Characteristics of the extraction beds. Symbols as presented in Table 7.

| <b>Plant</b>           | <b>d (m)</b>         | <b>q<sub>s</sub> (g L<sup>-1</sup>)</b> | <b>ε (-)</b> | <b>a<sub>0</sub> (m<sup>-1</sup>)</b> |
|------------------------|----------------------|-----------------------------------------|--------------|---------------------------------------|
| <i>A. archangelica</i> | 7.2 10 <sup>-4</sup> | 680                                     | 0.461        | 4490                                  |
| <i>C. paradisi</i>     | 1.9 10 <sup>-3</sup> | 616                                     | 0.395        | 1910                                  |
| <i>C. monnieri</i>     | 3.9 10 <sup>-4</sup> | 721                                     | 0.294        | 10860                                 |
| <i>P. corylifolia</i>  | 2.3 10 <sup>-4</sup> | 703                                     | 0.405        | 15520                                 |

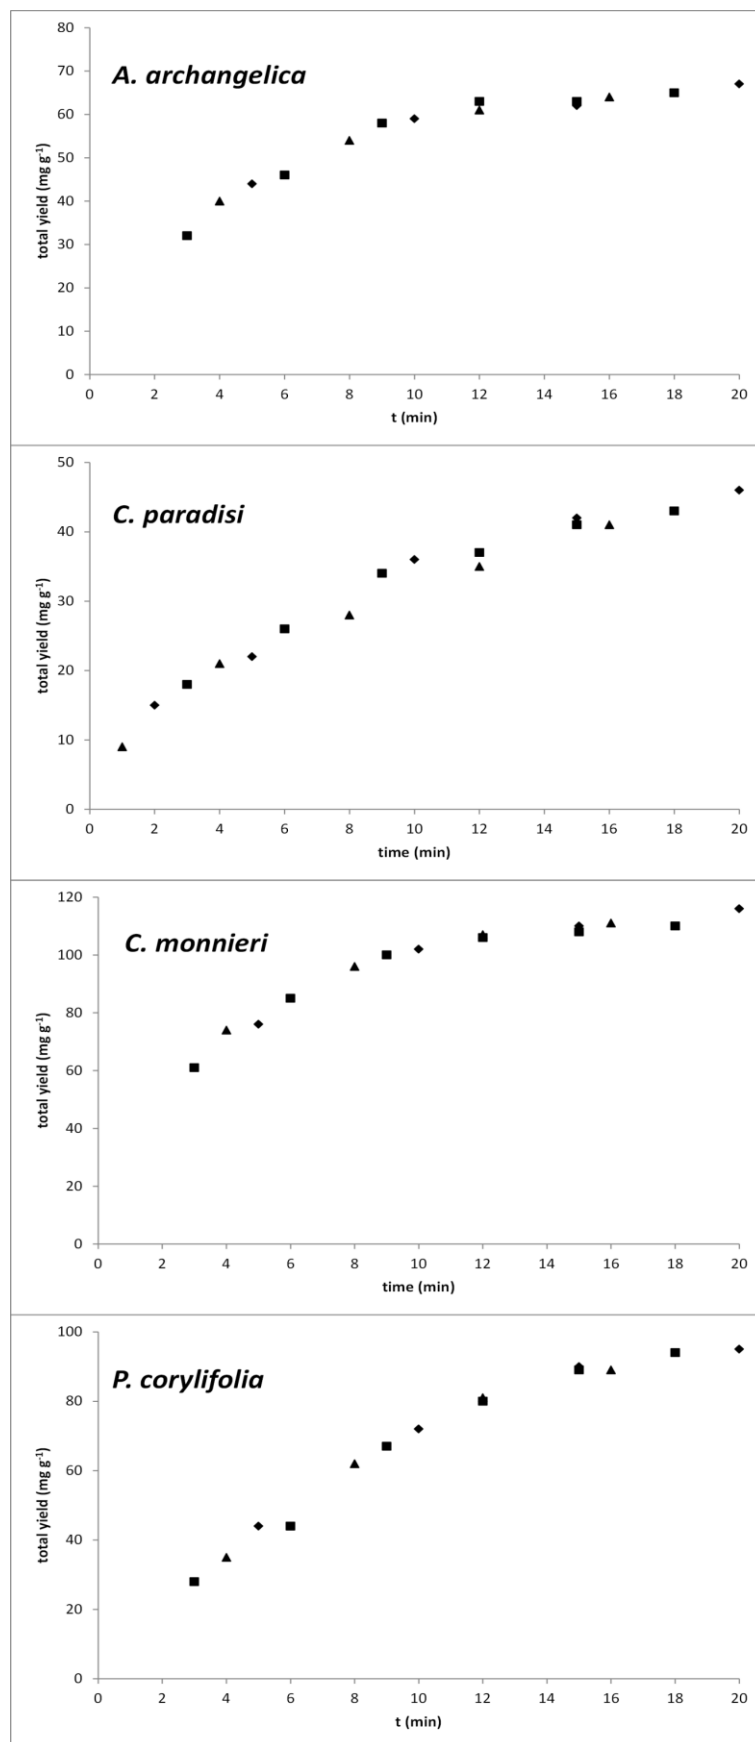

Figure S1. Total extraction curves for plant tissues at a temperature of 80 °C and pressure of 40 MPa. The black points (squares, triangles, and diamonds) represent experimental data from three processes.
